# Supplementary material for: Ag incorporated Mn3O4/AC nanocomposite based supercapacitor devices with high energy density and power density
Source: Royal Society of Chemistry journal article supplement (doi:10.1039/c4dt02287d), 2014-09-30
Supplement: c4dt02287d1.pdf [file c4dt02287d1.pdf]

**Ag incorporated Mn<sub>3</sub>O<sub>4</sub>/AC nanocomposites based supercapacitor devices  
with high energy density and power density.**

S. Nagamuthu, S. Vijayakumar, and G. Muralidharan\*

\* Department of Physics, Gandhigram Rural Institute – Deemed University, Gandhigram – 624 302, Dindigul, Tamilnadu, India

T1: Elemental composition of AgM/AC-2.5

| Element   | Series   | norm. C<br>[wt.%] | Atom. C<br>[at.%] | Error<br>[wt.%] |
|-----------|----------|-------------------|-------------------|-----------------|
| Oxygen    | K-series | 35.80             | 56.13             | 4.29            |
| Manganese | K-series | 51.47             | 23.51             | 1.23            |
| Carbon    | K-series | 9.37              | 19.58             | 1.64            |
| Silver    | L-series | 3.36              | 0.78              | 0.13            |
|           | Total    | 100.00            | 100.00            |                 |

T2: Elemental composition of AgM/AC-10

| Element   | Series   | norm. C<br>[wt.%] | Atom. C<br>[at.%] | Error<br>[wt.%] |
|-----------|----------|-------------------|-------------------|-----------------|
| Oxygen    | K-series | 47.78             | 60.73             | 5.51            |
| Manganese | K-series | 26.59             | 9.84              | 0.64            |
| Carbon    | K-series | 16.34             | 27.67             | 2.28            |
| Silver    | L-series | 9.29              | 1.75              | 0.29            |
|           | Total    | 100.00            | 100.00            |                 |

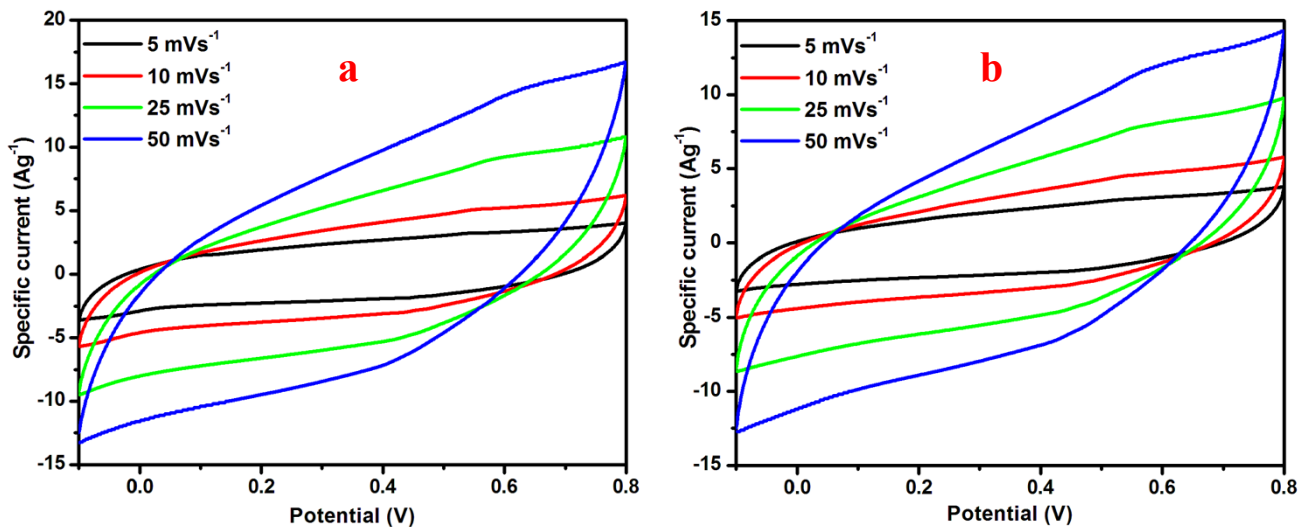

Figure S1 (a) CV curves of AgM/AC-2.5 at different scan rate  
 (b) CV curves of AgM/AC-10 at different scan rate

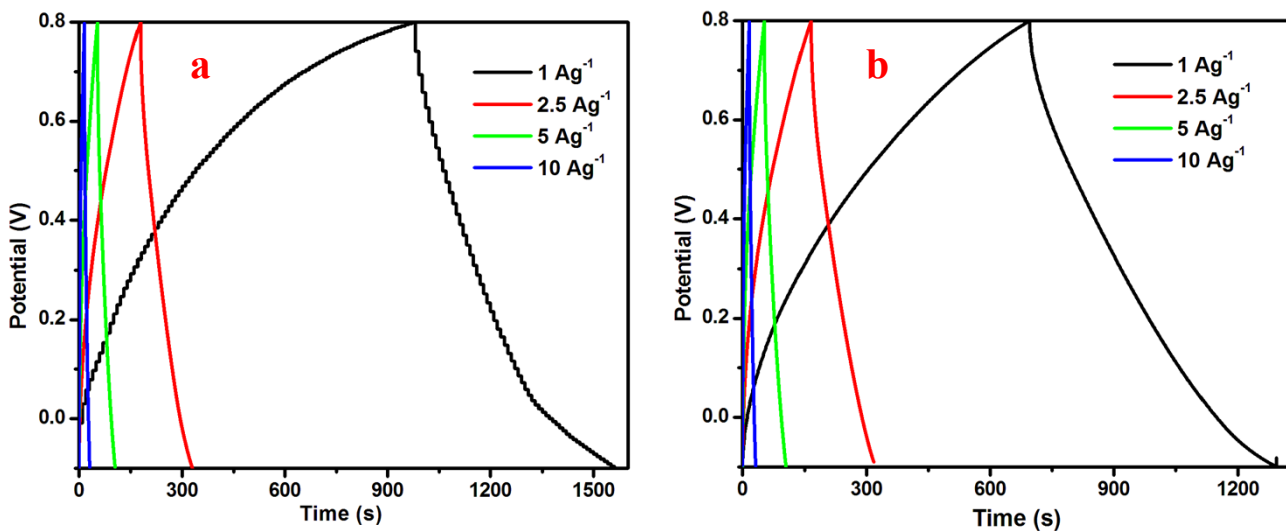

Figure S2 (a) charge-discharge curves of AgM/AC-2.5 at different specific currents  
 (b) charge-discharge curves of AgM/AC-10 at different specific currents
